# Supplementary material for: N-Doped Graphene Quantum Dots/Titanium Dioxide Nanocomposites: A Study of ROS-Forming Mechanisms, Cytotoxicity and Photodynamic Therapy
Source: MDPI journal article supplement (doi:10.3390/biomedicines10020421), 2022-02-10
Supplement: s1 [file s1]

## Supplementary Material

# N-Doped Graphene Quantum Dots/Titanium Dioxide Nanocomposites: A Study of ROS-Forming Mechanisms, Cytotoxicity and Photodynamic Therapy

Pravena Ramachandran <sup>1</sup>, Boon-Keat Khor <sup>2</sup>, Chong Yew Lee <sup>2</sup>, Ruey-An Doong <sup>3</sup>, Chern Ein Oon <sup>4</sup>, Nguyen Thi Kim Thanh <sup>5,6,\*</sup> and Hooi Ling Lee <sup>1,7,\*</sup>

<sup>1</sup> Nanomaterials Research Group, School of Chemical Sciences, Universiti Sains Malaysia, USM, Penang 11800, Malaysia; pravena@ioioleo.com

<sup>2</sup> School of Pharmaceutical Sciences, Universiti Sains Malaysia, USM, Penang 11800, Malaysia; khorboonkeat@student.usm.my (B.-K.K.); chongyew@usm.my (C.Y.L.)

<sup>3</sup> Institute of Analytical and Environmental Sciences, National Tsing Hua University, Hsinchu 30013, Taiwan; radoong@mx.nthu.edu.tw

<sup>4</sup> Institute for Research in Molecular Medicine (INFORMM), Universiti Sains Malaysia, USM, Penang 11800, Malaysia; chern.oon@usm.my

<sup>5</sup> Biophysics Group, Department of Physics and Astronomy, University College London, Gower Street, London WC1E 6BT, UK

<sup>6</sup> UCL Healthcare Biomagnetics and Nanomaterials Laboratories, 21 Albemarle Street, London W1S 4BS, UK

<sup>7</sup> School of Chemistry, The University of Sydney, Sydney, NSW 2006, Australia

\* Correspondence: ntk.thanh@ucl.ac.uk (N.T.K.T.); hllee@usm.my (H.L.L.)

**Table S1.** Crystallite size, lattice parameters and lattice strain of TiO<sub>2</sub> NPs and N-GQDs/TiO<sub>2</sub> NCs.

| Nanomaterial                 | Crystallite size (nm) | Lattice parameter, a (Å) | Lattice parameter, c (Å) | Lattice strain |
|------------------------------|-----------------------|--------------------------|--------------------------|----------------|
| TiO <sub>2</sub> NPs         | 12.2                  | 3.782                    | 9.514                    | 0.0008         |
| N-GQDs/ TiO <sub>2</sub> NCs | 11.2                  | 3.794                    | 9.523                    | 0.0014         |

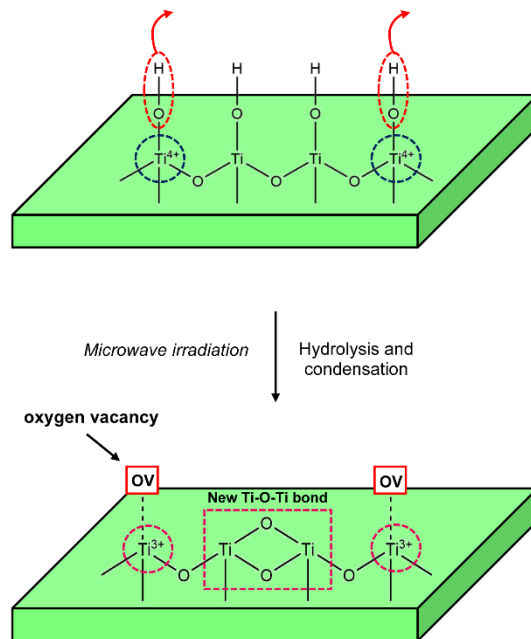

**Figure S1** The possible formation mechanism of oxygen vacancies and  $\text{Ti}^{3+}$  ions.

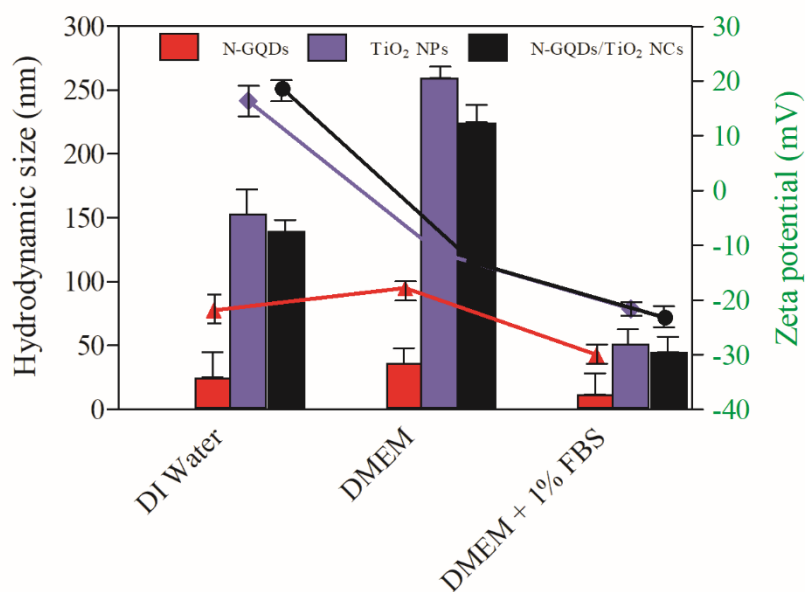

**Figure S2** Hydrodynamic size and zeta potential of N-GQDs,  $\text{TiO}_2$  NPs, N-GQDs/ $\text{TiO}_2$  NCs in cell culture medium (mean  $\pm$  SD,  $n=3$ ). The nanomaterials were dispersed in water or medium with or without FBS (1%, v/v), then sonicated, vortexed and hydrodynamic size and zeta

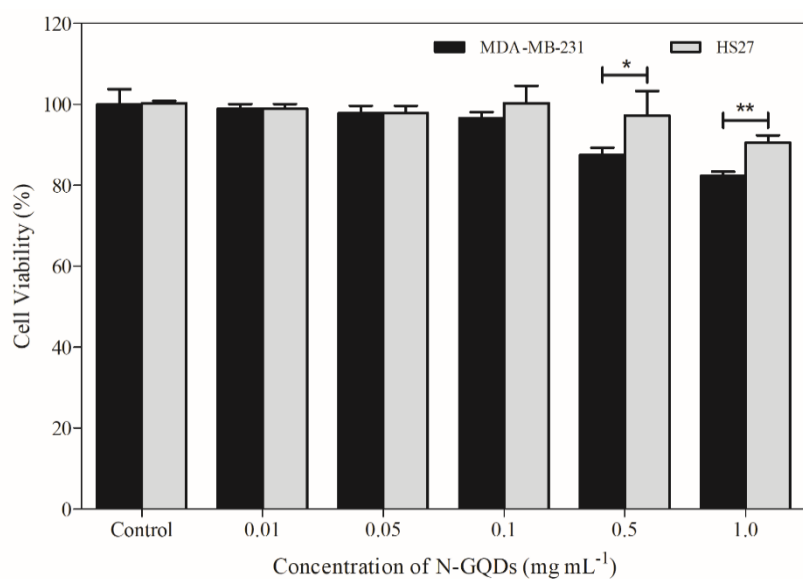

**Figure S3** Cell viability of MDA-MB-231 and HS27 cells after 24 h post-treatment. Data are presented as the mean  $\pm$  SD of two independent experiments made in three replicates ( $n = 6$ ) and normalized to control. Significant difference was tested using two-way ANOVA followed by Bonferroni post-hoc test as compared to control \*( $p < 0.05$ ) and \*\*( $p < 0.01$ ).
